# Supplementary material for: Investigation of anti-cancer and migrastatic properties of novel curcumin derivatives on breast and ovarian cancer cell lines
Source: Springer Nature journal article supplement (doi:10.1186/s12906-019-2685-3), 2019-10-21
Supplement: MOESM1 [file 12906_2019_2685_MOESM1_ESM%20.doc]

**Investigation of anti-cancer and migrastatic properties of novel curcumin derivatives on breast and ovarian cancer cell lines**

Jinsha Korotha,b, Snehal Nirgudea,b, Shweta Tiwarid, Vidya Gopalakrishnana,b,c, Raghunandan Mahadevaa, Sujeet Kumard, Subhas S Karkid, *Bibha Choudharya

*a. Institute of Bioinformatics and Applied Biotechnology, Electronic city phase 1, Bangalore, 560100, India*

*b. JK , SN and VG are graduate students registered under Manipal Academy of Higher Education, Manipal, 576104, India*

*c. Department of Biochemistry, Indian Institute of Science, Bangalore,560012, India*

*d. Department of Pharmaceutical Chemistry, KLE Academy of Higher Education & Research, KLE College of Pharmacy, Rajajinagar, Bangalore, KN, India*

*Corresponding author :

Bibha Choudhary

Institute of Bioinformatics and Applied Biotechnology

Electronic city phase 1, Bangalore, Karnataka, India

Tel.:080-285 289 00, fax: 080-285 289 04

e-mail: vibhachou@gmail.com

**Supplementary information:**

**Results:**

| **Curcumin** | |
| --- | --- |
| 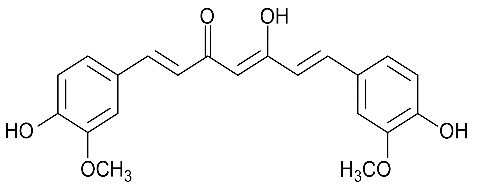 | |
| **Cell lines** | **IC50 (uM)** |
| Nalm6 | 12 |
| K562 | 0.056 |
| PA1 | 6 |
| A2780 | 7 |

**Table S1: Curcumin structure and IC50 values**

**Figure S1: Mass spectrometry data:**

**ST03:**

**
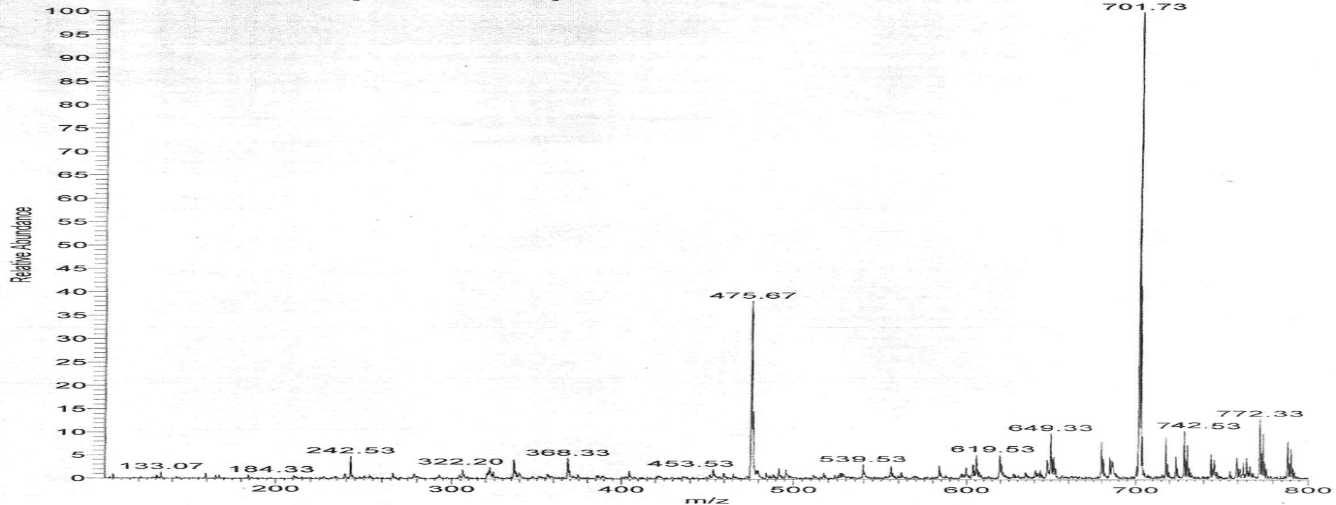
**

**ST08:**

**
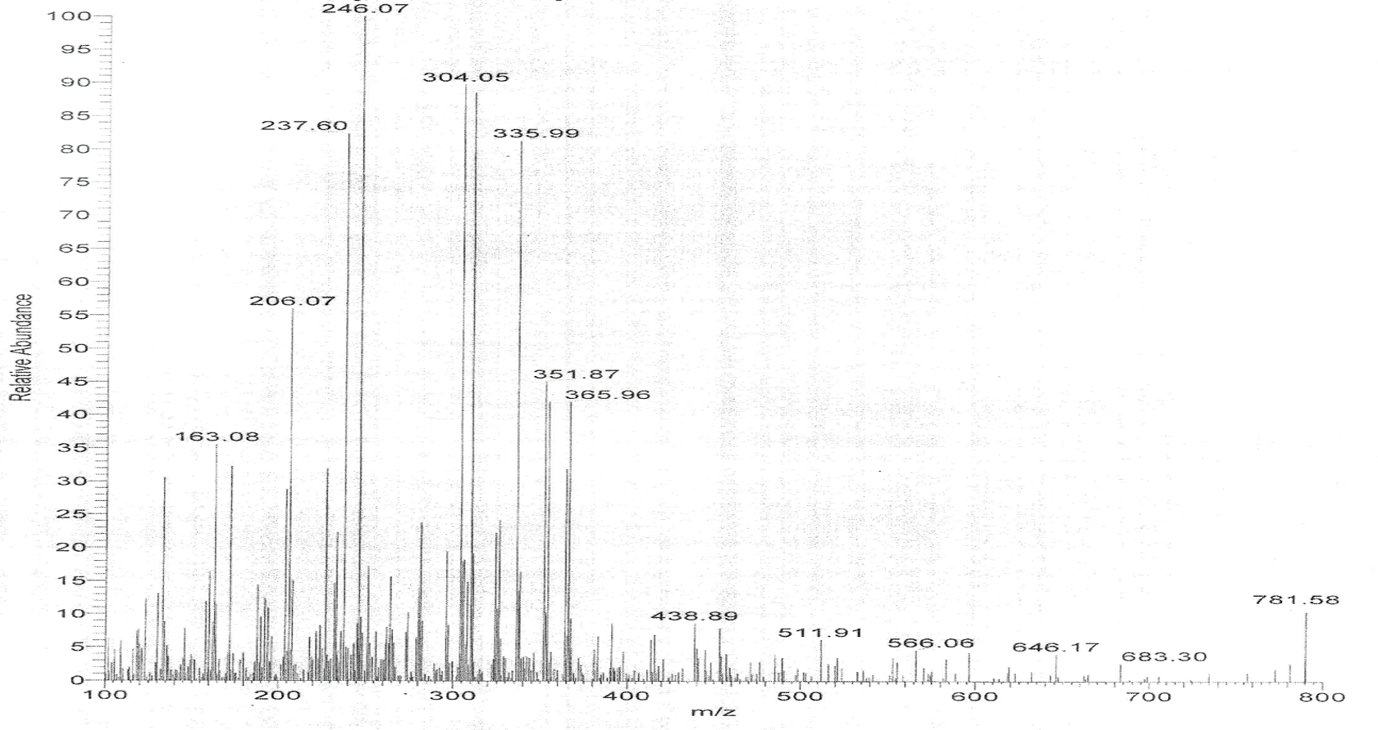
**

**Figure S2: 1HNMR data:**

**ST03:**

**
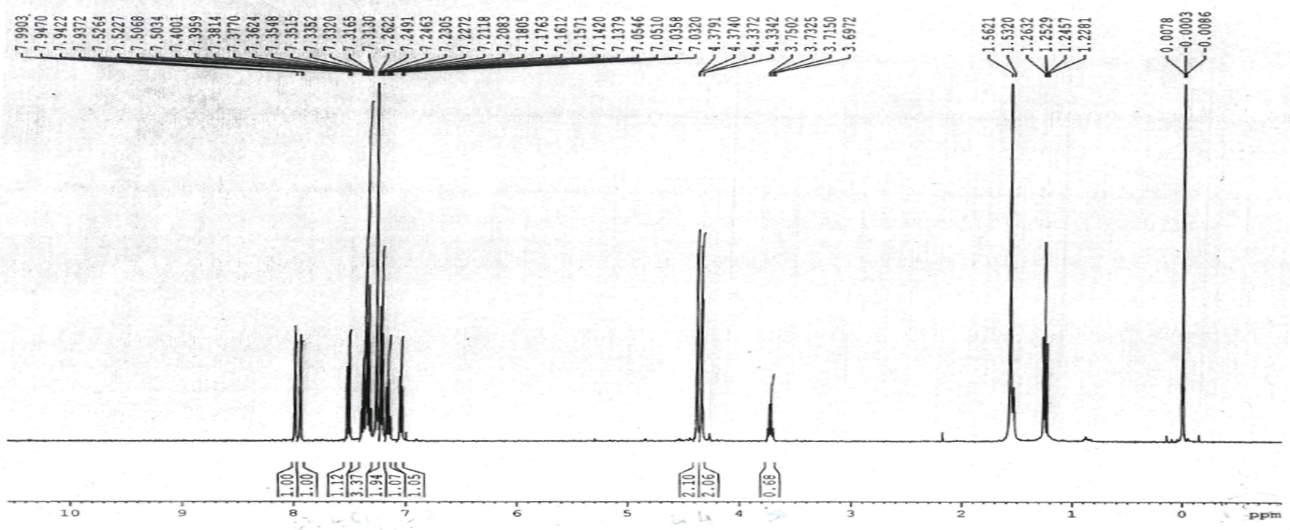
**

**ST08:**

**
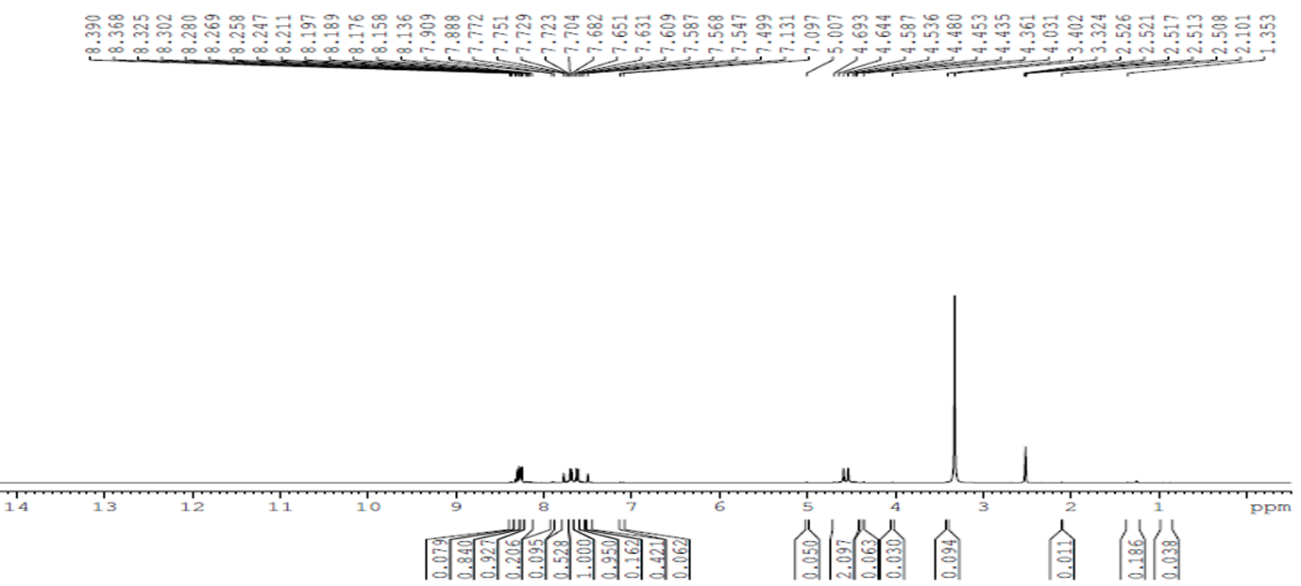
**
